# Supplementary material for: Standardization of the assessment process within telerehabilitation in chronic diseases: a scoping meta-review
Source: Springer Nature journal article supplement (doi:10.1186/s12913-022-08370-y), 2022-08-02
Supplement: MOESM1 [file 23328974]

**Additional File 1** Search Strategy as used in Web of Science on October 2, 2019

---

| <b>Search category</b> | <b>Search keywords</b>                                                                                                                                                                                                                                                                                                                                       |
|------------------------|--------------------------------------------------------------------------------------------------------------------------------------------------------------------------------------------------------------------------------------------------------------------------------------------------------------------------------------------------------------|
| Telerehabilitation     | TI=(telerehabilitation* OR tele-rehabilitation* OR "tele rehabilitation*" OR "remote rehabilitation*" OR "virtual NEAR/4 rehabilitation*" OR "web-based NEAR/3 rehabilitation*" OR ehealth OR e-health OR mhealth OR m-health OR "app-based rehabilitation" OR telecare OR telecommunication OR telemonitoring OR "web-based NEAR/3 intervention" OR mobile) |
| Evaluation             | TI=(evaluat* OR assess* OR apprais* OR effectiveness OR feasibilit*)                                                                                                                                                                                                                                                                                         |
| Chronic disease        | TI=("chronic disease*" OR "noncommunicable disease*" OR "chronic illness*" OR "chronic respiratory disease" OR COPD OR "Chronic Obstructive Pulmonary Disease" OR Asthma OR Diabetes OR "Cardiovascular disease" OR hypertension OR "Pulmonary Heart Disease" OR cancer OR obesity)                                                                          |
| Combination            | #3 AND #2 AND #1                                                                                                                                                                                                                                                                                                                                             |

---

The steps followed: **1/** Telerehabilitation OR telemedicine OR ... OR ... (category 1); **2/** evaluation OR assess\* OR... (category 2); **3/** chronic disease OR non-communicable disease OR chronic illness OR... (category 3); **4/** ti(category 1) AND ab(category 1); **5/** ti(category 2) AND ab(category 2); **6/** ti(category 3) AND ab(category 3); **7/** 4/ AND 5/ AND 6/
