# Supplementary material for: Standardization of the assessment process within telerehabilitation in chronic diseases: a scoping meta-review
Source: Springer Nature journal article supplement (doi:10.1186/s12913-022-08370-y), 2022-08-02

**Additional file 3** Types of associated technological tools

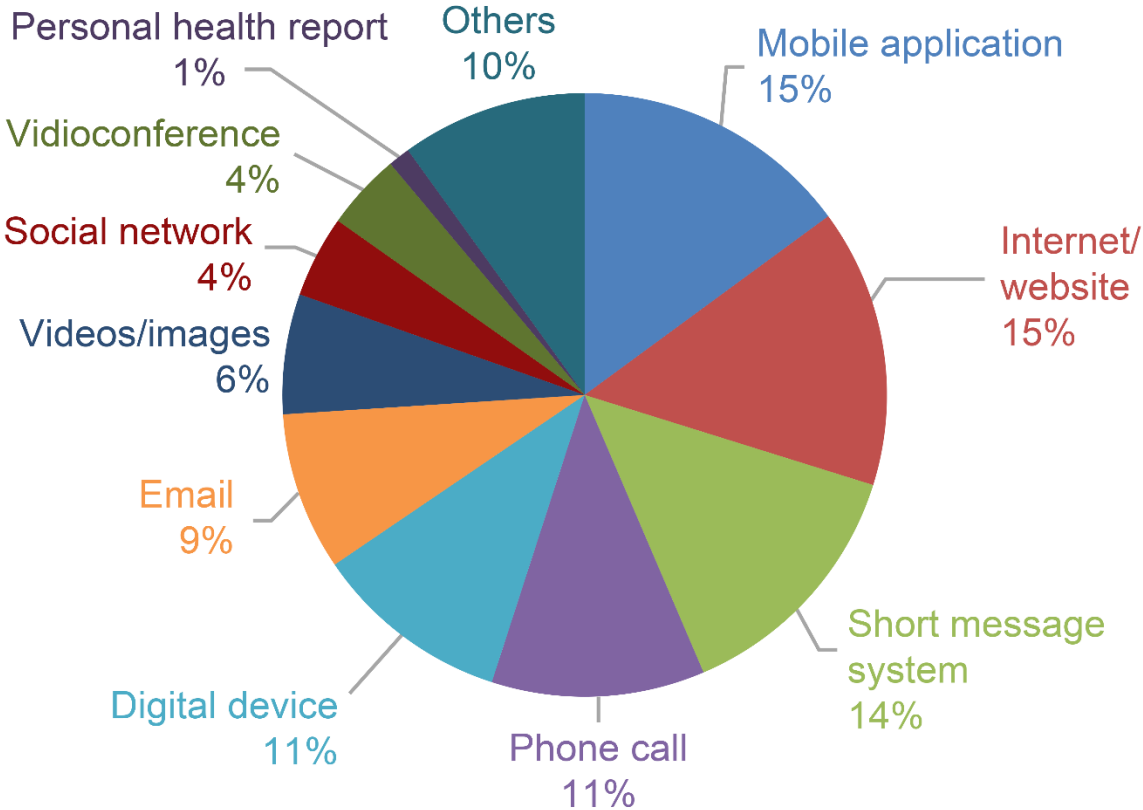

Supplement: MOESM3 [file 23328974]
