# Supplementary material for: Standardization of the assessment process within telerehabilitation in chronic diseases: a scoping meta-review
Source: Springer Nature journal article supplement (doi:10.1186/s12913-022-08370-y), 2022-08-02
Supplement: MOESM4 [file 23328974]

|                            |                          |           |                                                                                                                                                                                                                                                                                                  |                                           |   |   |   |   |   |   |
|----------------------------|--------------------------|-----------|--------------------------------------------------------------------------------------------------------------------------------------------------------------------------------------------------------------------------------------------------------------------------------------------------|-------------------------------------------|---|---|---|---|---|---|
| Bassi et al., 2014         | Qualitative syst. review | CVC; D; O | management (i.e., diet, physical activity [PA], weight control)<br>To investigate optimal methods for achieving lifestyle change in metabolic syndrome through a systematic literature review based on the Preferred Reporting Items for Systematic Reviews and Meta-Analyses (PRISMA) framework | Patient                                   | x |   | x | x |   | x |
| Beatty et al.              | Qualitative syst. review | CVC       | To examine the existing literature on the use of mobile technology for cardiac rehabilitation and propose a framework for developing and evaluating mobile applications for cardiac rehabilitation                                                                                               | Patient & health professional             |   |   |   |   |   | x |
| Beishuizen et al., 2016    | QSR and meta-analysis    | CVC; D; O | To evaluate whether Web-based interventions for cardiovascular risk factor management reduce the risk of cardiovascular disease in older people                                                                                                                                                  | Patient & health professional             | x |   | x |   |   | x |
| Bellei et al., 2018        | Qualitative syst. review | D         | To identify and analyze studies regarding the diversity of applications designed for DM monitoring and treatment                                                                                                                                                                                 | Patient & health professional             |   | x |   | x |   |   |
| Bennett et al., 2014       | Qualitative syst. review | O         | To evaluate the efficacy of eHealth weight management interventions among overweight and obese racial/ethnic minority adults                                                                                                                                                                     | Patient & health professional & caregiver | x |   |   |   |   | x |
| Beratarrechea et al., 2014 | Qualitative syst. review | CRD; D    | To discuss the impact of mobile health (m-health) on chronic disease outcomes (including morbidity, mortality, hospitalization rates, behavioral or lifestyle changes, process of care improvements, clinical outcomes, costs,                                                                   |                                           | x |   | x | x | x | x |

| Author(s), Year         | Study Design                                    | Methodology | Objective                                                                                                                                                                                                                                                                                                   | Population                    | Intervention | Comparator | Outcomes |
|-------------------------|-------------------------------------------------|-------------|-------------------------------------------------------------------------------------------------------------------------------------------------------------------------------------------------------------------------------------------------------------------------------------------------------------|-------------------------------|--------------|------------|----------|
| Birkhoff et al., 2016   | Qualitative syst. review                        | CVC; CRD; D | patient-provider satisfaction, compliance, and health-related quality of life (HRQoL)) in low- and middle-income countries (LMIC)<br>To present a synthesis of the current qualitative research addressing the motivating factors, usability, and experiences of mobile health tracking applications (apps) | Patient                       | x            | x          |          |
| Borries et al., 2019    | Scoping review                                  | D           | To identify peer-reviewed medical literature on the use of telemedicine, assess its impact on self-management processes and the clinical outcomes of care, and delineate research gaps                                                                                                                      | Patient                       | x            | x          | x        |
| Bossen et al., 2014     | Qualitative syst. review                        | CVC; D; O   | To summarize the evidence on the effectiveness of web-based PA interventions                                                                                                                                                                                                                                | Patient                       | x            | x          |          |
| Brunton et al., 2015    | QSR and meta-syntheses (issue meta-ethnography) | CRD         | To systematically review and synthesize the findings from qualitative studies that investigated user perspectives and experiences of telehealth in COPD management in order to identify factors that may impact uptake                                                                                      | Patient & health professional | x            | x          | x        |
| Can Hou et al., 2016    | QSR and meta-analysis                           | D           | To investigate the effect of mobile phone applications (apps) on glycemic control (HbA1c) in diabetes self-management                                                                                                                                                                                       | Patient & health professional | x            | x          | x        |
| Cassimatis et al., 2012 | Qualitative syst. review                        | D           | To review the effect of behavioral telehealth interventions on glycemic control and diabetes self-management                                                                                                                                                                                                | Patient & health professional | x            | x          | x        |

|                        |                          |          |                                                                                                                                                                                                                                                    |                               |   |   |   |   |   |   |
|------------------------|--------------------------|----------|----------------------------------------------------------------------------------------------------------------------------------------------------------------------------------------------------------------------------------------------------|-------------------------------|---|---|---|---|---|---|
| Chomutare et al., 2011 | Qualitative syst. review | D        | To study the salient features of mobile applications for diabetes care, in contrast to clinical guideline recommendations                                                                                                                          | Patient                       | x | x | x | x |   |   |
| Clark et al., 2013     | Qualitative syst. review | CVC      | To identify and critique evidence for the effectiveness of alternative models of cardiac rehabilitation                                                                                                                                            | Patient & health professional | x |   | x | x | x | x |
| Cotter et al., 2014    | Qualitative syst. review | D        | To identify studies that used Internet-based interventions to promote lifestyle modification                                                                                                                                                       | Patient & health professional | x | x |   | x |   | x |
| Cui et al., 2016       | QSR and meta-analysis    | D        | To conduct a systematic review and meta-analysis of randomized controlled trials (RCTs) assessing the effect of mHealth apps on changes in hemoglobin A1c (HbA1c), blood glucose, blood pressure, serum lipids, and body weight in type 2 diabetes | Patient & health professional |   |   |   | x |   | x |
| Dale et al., 2016      | Qualitative syst. review | CVC      | To determine the effect of mHealth interventions on behavioral lifestyle changes and medication adherence for cardiovascular disease self-management                                                                                               | Patient & health professional | x |   | x | x |   | x |
| Dounavi et al., 2019   | Qualitative syst. review | MC; D; O | To identify existing evidence on the efficacy of mobile health technology in facilitating weight management behavior, such as healthy food consumption and physical activity                                                                       | Patient & health professional |   | x |   | x |   | x |
| Duff et al., 2017      | Qualitative syst. review | CVC      | To assess the application of BCTs in eHealth interventions designed to increase PA                                                                                                                                                                 | Patient & health professional |   |   |   | x |   |   |

|                         |                          |                   |                                                                                                                                                                                                                   |                               |   |   |   |   |   |   |   |
|-------------------------|--------------------------|-------------------|-------------------------------------------------------------------------------------------------------------------------------------------------------------------------------------------------------------------|-------------------------------|---|---|---|---|---|---|---|
| Fu et al., 2017         | Qualitative syst. review | D                 | To assess the usability and clinical effectiveness of diabetes mobile applications (diabetes apps)                                                                                                                | Patient & health professional | x |   | x |   | x |   | x |
| Gaikwad et al., 2009    | Qualitative syst. review | CVC; C; CRD; D; O | To evaluate the feasibility and benefits of home-based information and communications technology-enabled interventions for chronic disease management, with emphasis on their impact on health outcomes and costs | Patient & health professional | x | x | x | x | x |   |   |
| Gaveikaite et al., 2019 | Umbrella                 | CRD               | To examine the provision and efficacy of telehealth for COPD management to guide future decision-making                                                                                                           | Patient & health professional | x |   | x | x | x |   | x |
| Goode et al., 2015      | Qualitative syst. review | C                 | To evaluate the efficacy of physical activity, dietary, and/or weight control interventions in which telephone, short-message service, print, and/or the internet is the primary method of delivery               | Patient & health professional | x | x | x | x |   | x | x |
| Gorst et al., 2014      | Qualitative syst. review | CVC; MCR          | To assess levels of uptake of home telehealth and the factors that determine whether patients do or do not accept and continue to use telehealth                                                                  | Patient & health professional | x |   |   | x |   | x |   |
| Haberlin et al., 2018   | Qualitative syst. review | C                 | To explore the effects of eHealth in the promotion of PA                                                                                                                                                          | Patient                       | x | x |   | x |   |   |   |
| Hailey et al., 2011     | Qualitative syst. review | CVC; C; CRD       | To systematically review the evidence on the effectiveness of telerehabilitation applications                                                                                                                     | Patient                       | x | x |   |   |   |   | x |
| Hall et al., 2015       | Umbrella                 | CVC; CRD; D; O    | To identify mobile text-messaging interventions designed for health                                                                                                                                               | Patient                       | x |   |   | x |   |   | x |

|                        |                          |             |                                                                                                                                                                                                                                                                                                                                                          |                               |   |   |   |   |   |  |   |
|------------------------|--------------------------|-------------|----------------------------------------------------------------------------------------------------------------------------------------------------------------------------------------------------------------------------------------------------------------------------------------------------------------------------------------------------------|-------------------------------|---|---|---|---|---|--|---|
| Hamilton et al., 2018  | Qualitative syst. review | CVC         | improvement and behavior change and to derive recommendations for practice<br>To assess the evidence on mHealth interventions for cardiac rehabilitation and heart failure management with respect to service and patient outcomes and cost effectiveness with a view to how mHealth could be utilized for rural, remote and Indigenous cardiac patients | Patient & health professional | x |   | x | x |   |  | x |
| Hamine et al., 2015    | Qualitative syst. review | CVC; CRD; D | To evaluate the effectiveness of mHealth in supporting the adherence of patients to chronic disease management ('mAdherence') and the usability, feasibility, and acceptability of mAdherence tools and platforms                                                                                                                                        | Patient & health professional | x | x |   | x | x |  | x |
| Hernandez et al., 2019 | Qualitative syst. review | C           | To assess the effectiveness of mHealth applications (apps) for self-management in improving pain, psychological distress, fatigue, or sleep outcomes                                                                                                                                                                                                     | Patient                       | x |   |   | x |   |  |   |
| Holtz et al., 2012     | Qualitative syst. review | D           | To understand the most common uses and functions of mobile phones in monitoring and managing diabetes, their potential role in a clinical setting, and the current state of research in this area                                                                                                                                                        | Patient                       | x | x |   | x |   |  | x |
| Huang et al., 2015     |                          | CVC         | To determine the effectiveness of a telehealth-delivered cardiac rehabilitation (CR) intervention compared with center-based supervised CR                                                                                                                                                                                                               | Patient & health professional | x |   |   |   |   |  | x |

|                         |                          |                   |                                                                                                                                                                                                                                                                           |                               |   |   |   |   |   |   |
|-------------------------|--------------------------|-------------------|---------------------------------------------------------------------------------------------------------------------------------------------------------------------------------------------------------------------------------------------------------------------------|-------------------------------|---|---|---|---|---|---|
| Hutchesson et al., 2015 | QSR and meta-analysis    | O                 | To evaluate the effectiveness of eHealth interventions for the prevention and treatment of overweight and obesity in adults.                                                                                                                                              | Patient & health professional | x |   |   |   |   | x |
| Iribarren et al., 2017  | QSR and meta-analysis    | CVC; C; CRD; D; O | The body of evidence related to economic evaluations of mHealth interventions is assessed and summarized                                                                                                                                                                  | Patient & health professional | x | x | x |   |   |   |
| Isaacs et al., 2016     | Qualitative syst. review | D                 | To examine (1) the research reporting practices and prevalence of ethnic minority patients included in telehealth RCTs and (2) the proportion of included RCTs that report using English language proficiency as a patient screening criterion and how and why they do so | Patient                       |   | x |   |   |   | x |
| James et al., 2017      | Qualitative syst. review | CVC; C; CRD; D; O | To present a systematic review of the participation of African Americans in e-Health/m-Health interventions, the diseases/health conditions targeted, and the recruitment and retention strategies used                                                                   | Patient & health professional | x | x |   |   |   | x |
| Joe et al., 2013        | Qualitative syst. review | D                 | To report on the results of a review concerning the use of mobile phones for health (feasibility, acceptability, and effectiveness)                                                                                                                                       | Patient & health professional | x |   |   | x |   | x |
| Joiner et al., 2017     | Qualitative syst. review | D                 | To describe Diabetes Prevention Program (DPP)-based lifestyle interventions delivered via electronic, mobile, and certain telehealth (eHealth)                                                                                                                            | Patient & health professional | x | x |   |   | x | x |





|                       |                          |                   |                                                                                                                                                                                                  |                               |   |   |   |   |   |  |   |
|-----------------------|--------------------------|-------------------|--------------------------------------------------------------------------------------------------------------------------------------------------------------------------------------------------|-------------------------------|---|---|---|---|---|--|---|
| Liang et al., 2011    | Qualitative syst. review | D                 | To assess the effect of mobile phone intervention on glycemic control                                                                                                                            | Patient & health professional | x | x |   |   |   |  | x |
| Lundell et al., 2015  | Meta-analysis            | CRD               | To investigate the effects of telehealthcare on PA level, physical capacity and dyspnea and to describe the interventions used                                                                   |                               | x |   | x |   |   |  | x |
| Ma et al., 2019       | QSR and meta-analysis    | CVC               | To identify the delivery mode and strategies used by current eHealth interventions and examine their effect on blood pressure control, self-care behavioral outcomes and psychosocial well-being | Patient & health professional | x |   | x |   |   |  | x |
| Maramba et al., 2019  | QSR and meta-analysis    | C; D              | To identify, explore, and summarize the current methods used in the usability testing of eHealth applications                                                                                    | Patient & health professional |   |   |   |   |   |  |   |
| McKay et al., 2018    | Scoping review           | CVC; C; CRD; D; O | To investigate approaches to the evaluation of health apps to identify any current best practices                                                                                                | Patient & health professional |   |   |   |   |   |  |   |
| Müller et al., 2016   | Qualitative syst. review | CVC; D; O         | To investigate the effectiveness of eHealth and mHealth interventions to promote PA and healthy diets in developing countries                                                                    | Patient                       |   |   |   | x |   |  |   |
| Neubeck et al., 2009  | Qualitative syst. review | CVC               | To determine the effectiveness of telehealth for coronary heart disease management                                                                                                               | Patient & health professional |   |   |   | x |   |  | x |
| Nussbaum et al., 2019 | QSR and meta-analysis    | CVC; C; CRD       | To conduct a systematic review to better define how medical mobile applications (apps) have been used in environments                                                                            | Patient & health professional |   | x | x | x | x |  | x |

|                           |                          |                   |                                                                                                                                                                                                                               |                               |   |   |   |     |
|---------------------------|--------------------------|-------------------|-------------------------------------------------------------------------------------------------------------------------------------------------------------------------------------------------------------------------------|-------------------------------|---|---|---|-----|
| Palmer et al., 2018       | Qualitative syst. review | CVC; C; CRD; D; O | relevant to physical medicine and rehabilitation<br>To assess the effectiveness of smoking cessation, PA, diet, and alcohol reduction interventions delivered by mobile technology to prevent noncommunicable diseases (NCDs) | Patient & health professional | x | x |   | x   |
| Puigdomenech et al., 2019 | QSR and meta-analysis    | O                 | To identify the efficacy, safety, and effectiveness criteria used to assess weight control, overweight, and obesity management in mobile health (mHealth) interventions                                                       | Patient & health professional |   | x |   | x x |
| Qudah et al., 2019        | Qualitative syst. review | CVC; C; CRD; D    | To explore the influence of mobile health applications on various dimensions of patient and healthcare provider relationships                                                                                                 | Patient & health professional | x | x | x |     |
| Raaijmakers et al., 2015  | Qualitative syst. review | O                 | To provide insight into the effectiveness of technology-based interventions for weight loss and quality of life compared to standard care                                                                                     | Patient & health professional |   | x |   | x   |
| Ramadas et al., 2011      | Qualitative syst. review | D                 | To provide a descriptive discussion of web-based behavioral interventions                                                                                                                                                     | Patient & health professional | x | x |   | x   |
| Ramsey et al., 2019       | Qualitative syst. review | CRD               | To review the content and quality of mHealth asthma management apps that are available to patients                                                                                                                            | Patient & health professional | x | x |   |     |
| Rawstorn et al., 2016     | Qualitative syst. review | CVC               | To determine the benefits of telehealth exCardiac Rehabilitation (CR) on exercise capacity and other modifiable                                                                                                               | Patient & health professional |   | x |   | x   |

|                         |                          |     |                                                                                                                                                                                                                                                                                                                                                         |                               |   |   |   |   |   |
|-------------------------|--------------------------|-----|---------------------------------------------------------------------------------------------------------------------------------------------------------------------------------------------------------------------------------------------------------------------------------------------------------------------------------------------------------|-------------------------------|---|---|---|---|---|
| Rincon et al., 2017     | QSR and meta-analysis    | C   | cardiovascular risk factors compared with traditional exCR and usual care<br>To review the scientific literature on mobile phone apps involving QoL and well-being (anxiety and depression symptoms) and analyze the clinical and technological characteristics, strengths, and weaknesses of these apps as well as patients' user experience with them | Patient & health professional |   |   | x |   | x |
| Rodríguez et al., 2019  |                          | D   | To assess the free mobile applications for the management of diabetes available in Spanish in the Spanish market                                                                                                                                                                                                                                        | Patient                       | x | x | x |   |   |
| Ruiz-Pérez et al., 2019 | Qualitative syst. review | CVC | To examine the impact of interventions to improve cardiovascular disease healthcare provided to people living in rural areas                                                                                                                                                                                                                            | Patient & health professional | x |   | x | x |   |
| Seiler et al., 2017     | Qualitative syst. review | C   | To evaluate existing eHealth/mHealth interventions developed to help manage cancer-related fatigue (CRF) and summarize the best available evidence on their effectiveness                                                                                                                                                                               | Patient & health professional | x |   | x |   | x |
| Stephens et al., 2013   | Qualitative syst. review | CVC | To determine user satisfaction with and effectiveness of smartphone applications and text messaging interventions to promote weight reduction and PA                                                                                                                                                                                                    | Patient & health professional |   |   | x |   | x |
| Sun et al., 2019        |                          | D   | To examine the literature evaluating the use of mobile apps (stand-alone and text messaging/feedback) and to review the top-rated mobile apps' applicability                                                                                                                                                                                            | Patient & health professional | x | x | x |   | x |

|                          |                              |                |                                                                                                                                                                                                                                                                                       |                                     |   |   |   |   |
|--------------------------|------------------------------|----------------|---------------------------------------------------------------------------------------------------------------------------------------------------------------------------------------------------------------------------------------------------------------------------------------|-------------------------------------|---|---|---|---|
| Tchero et al.,<br>2019   | Qualitative<br>syst. review  | D              | To compare the effectiveness of<br>telemedicine intervention with that of<br>usual care                                                                                                                                                                                               | Patient &<br>health<br>professional | x | x |   | x |
| Triberti et al.,<br>2019 | QSR and<br>meta-<br>analysis | C              | To explore the usage and effectiveness<br>of eHealth resources to improve breast<br>cancer patients'/survivors' quality of life<br>and to describe if existing eHealth<br>interventions addressed specific<br>characteristics of breast cancer or<br>employed a generic approach only | Patient &<br>health<br>professional |   |   | x | x |
| Unni et al.,             | Qualitative<br>syst. review  | MCR            | To summarize the use of technological<br>aids and evaluate their impact on health<br>outcomes (adherence and asthma<br>control)                                                                                                                                                       | Patient &<br>health<br>professional |   |   | x | x |
| Vassilev et al.,<br>2015 | Qualitative<br>syst. review  | CVC; CRD;<br>D | To identify the core mechanisms<br>associated with successful telehealth<br>implementation to consolidate the likely<br>elements for ensuring a priori optimal<br>design and deployment of telehealth<br>interventions                                                                | Patient &<br>health<br>professional |   | x | x |   |
| Wang et al.,<br>2017     |                              | D; O           | To examine published mHealth<br>intervention studies for obesity and<br>diabetes treatment and management to<br>assess their effectiveness and provide<br>recommendations for future research                                                                                         | Patient &<br>health<br>professional | x |   | x | x |
| Widmer et al.,<br>2015   | Meta-<br>analysis            | CVC            | To assess the potential benefit of digital<br>health interventions (DHIs) on outcomes<br>(events, all-cause mortality,<br>hospitalizations) and risk factors<br>compared with non-DHIs                                                                                                | Patient &<br>health<br>professional |   |   |   | x |

|                        |                             |                |                                                                                                                                                                                                                                                                                           |                                     |   |   |   |
|------------------------|-----------------------------|----------------|-------------------------------------------------------------------------------------------------------------------------------------------------------------------------------------------------------------------------------------------------------------------------------------------|-------------------------------------|---|---|---|
| Winter et al.,<br>2016 | Qualitative<br>syst. review | CVC            | To examine the use of health behavior change techniques and theory in technology-enabled interventions targeting risk factors and indicators for cardiovascular disease (CVD) prevention and treatment                                                                                    | Patient &<br>health<br>professional | x | x |   |
| Wu et al.,<br>2018     | Qualitative<br>syst. review | D              | To systematically review the literature and perform a meta-analysis comparing the clinical outcomes of telehealth and usual care in the management of diabetes                                                                                                                            | Patient &<br>health<br>professional | x |   |   |
| Xiong et al.,<br>2018  | Qualitative<br>syst. review | CVC            | To systematically review existing evidence on the effectiveness of mobile health technology (mHealth) interventions in addressing medication adherence among people with hypertension                                                                                                     | Patient &<br>health<br>professional | x | x | x |
| Yasmin et al.,<br>2016 | Realist<br>review           | CVC; CRD;<br>D | To carry out a systematic literature review on the impact of mobile health interventions - mobile phone texts and/or voice messages - in high, middle- and low-income countries to ascertain the impact on patients' adherence to medical advice as well as the impact on health outcomes | Patient &<br>health<br>professional |   | x | x |

---

**\*Pathologies:** CVC, cardiovascular disease; C, cancer; CRD, chronic respiratory diseases; D, diabetes; O, obesity

**\*\*Domains of assessment from the EUnetHTA model:** A, health issue and current use of technology; B, description and technical characteristics of the technology; C, cost and economic evaluation; D, social aspects; E, organizational aspects; F, legal aspects; G, ethical analysis; H, accuracy; I, clinical effectiveness; J, safety
