# Supplementary material for: Standardization of the assessment process within telerehabilitation in chronic diseases: a scoping meta-review
Source: BMC Health Serv Res. 2022 Aug 2;22:984. doi: 10.1186/s12913-022-08370-y (PMC9344755; doi:10.1186/s12913-022-08370-y)
Supplement: Supplementary file 5 — Additional file 5. [file 12913_2022_8370_MOESM5_ESM.pdf]

**Additional File 5** A sample of the intervention characteristics (identified in 10 reviews by a check mark if they were present)

[illegible]
